# Supplementary material for: Senescence Is the Main Trait Induced by Temozolomide in Glioblastoma Cells
Source: MDPI journal article supplement (doi:10.3390/cancers14092233), 2022-04-29
Supplement: s1 [file s1]

# Supplementary Material: Senescence Is the Main Trait Induced by Temozolomide in Glioblastoma Cells

Lea Beltzig, Christian Schwarzenbach, Petra Leukel, Katrin B. M. Frauenknecht, Clemens Sommer, Alessandro Tancredi, Monika E. Hegi, Markus Christmann and Bernd Kaina\*

## Supplement: Raw Data

Blot for kinetics of MGMT induction following  
Dox treatment  
→ Raw Data for Fig.5

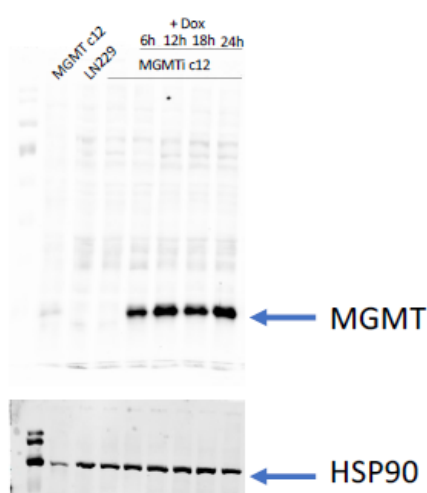

Blot for MGMT induction in replicating and senescent  
MGMTi  
→ Raw Data for Fig.5

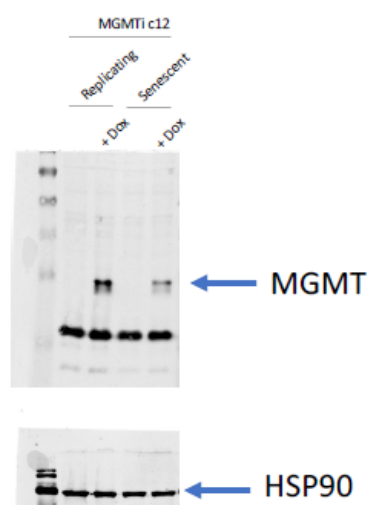

Raw data for Figure 5.

**Blots for DDR**  
→ Raw Data for Fig.6 A

Blot stripped after detection of phosphorylated proteins (#1) to detect total protein (#2). Blots afterwards used for detection of loading control (#3)

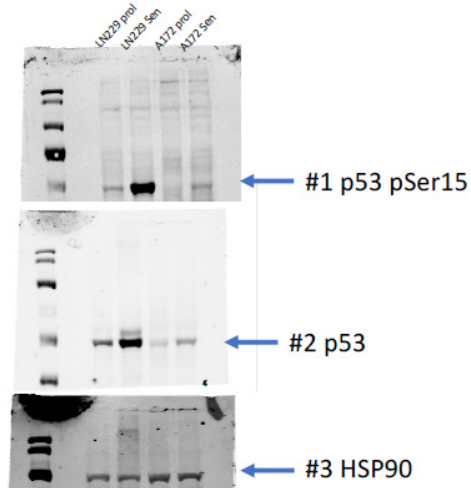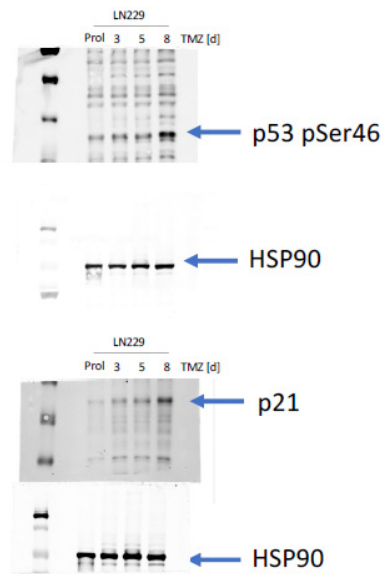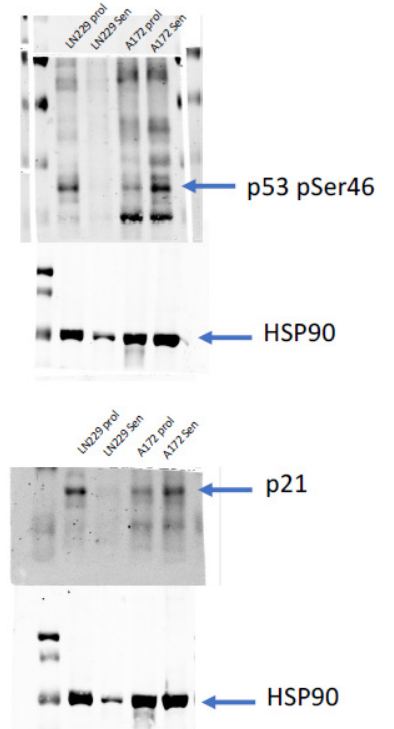

Raw data for Figure 6A.

**Blot for DDR**  
→ Raw Data for Fig.6 B

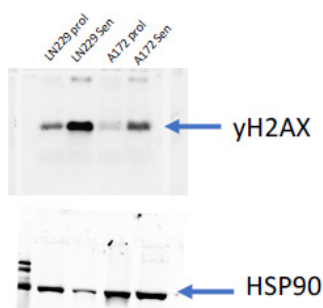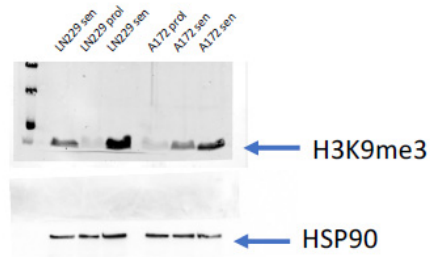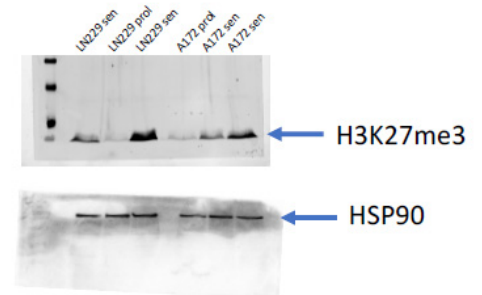

Raw data for Figure 6B.

Blot for DDR  
→ Raw Data for Fig.S3

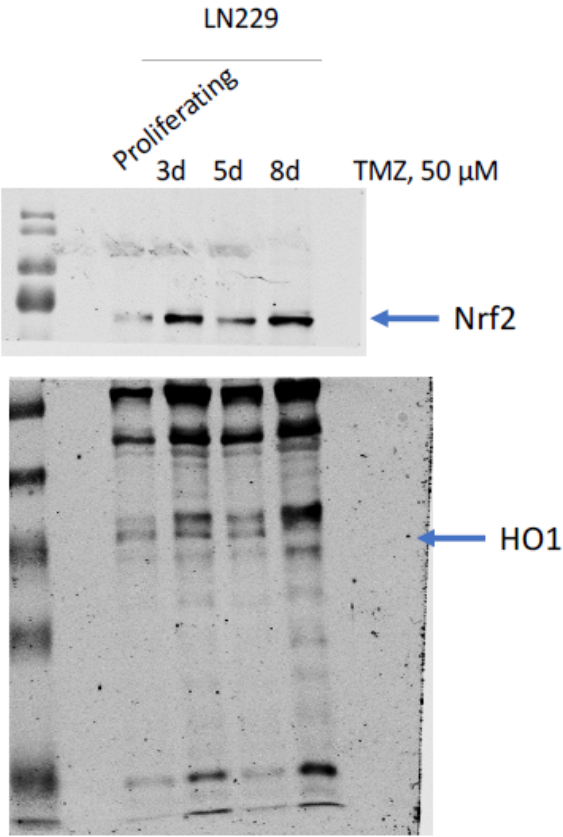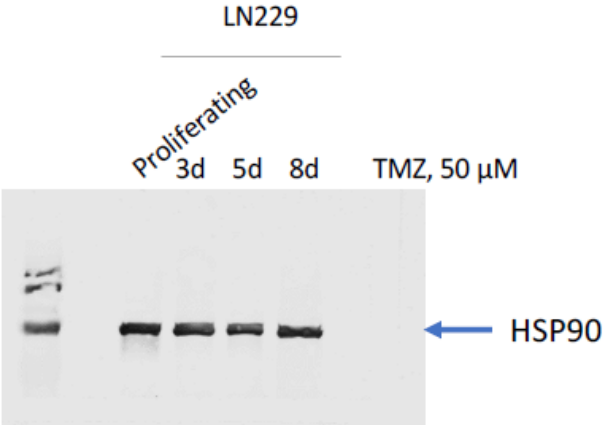

Raw data for Figure S3.

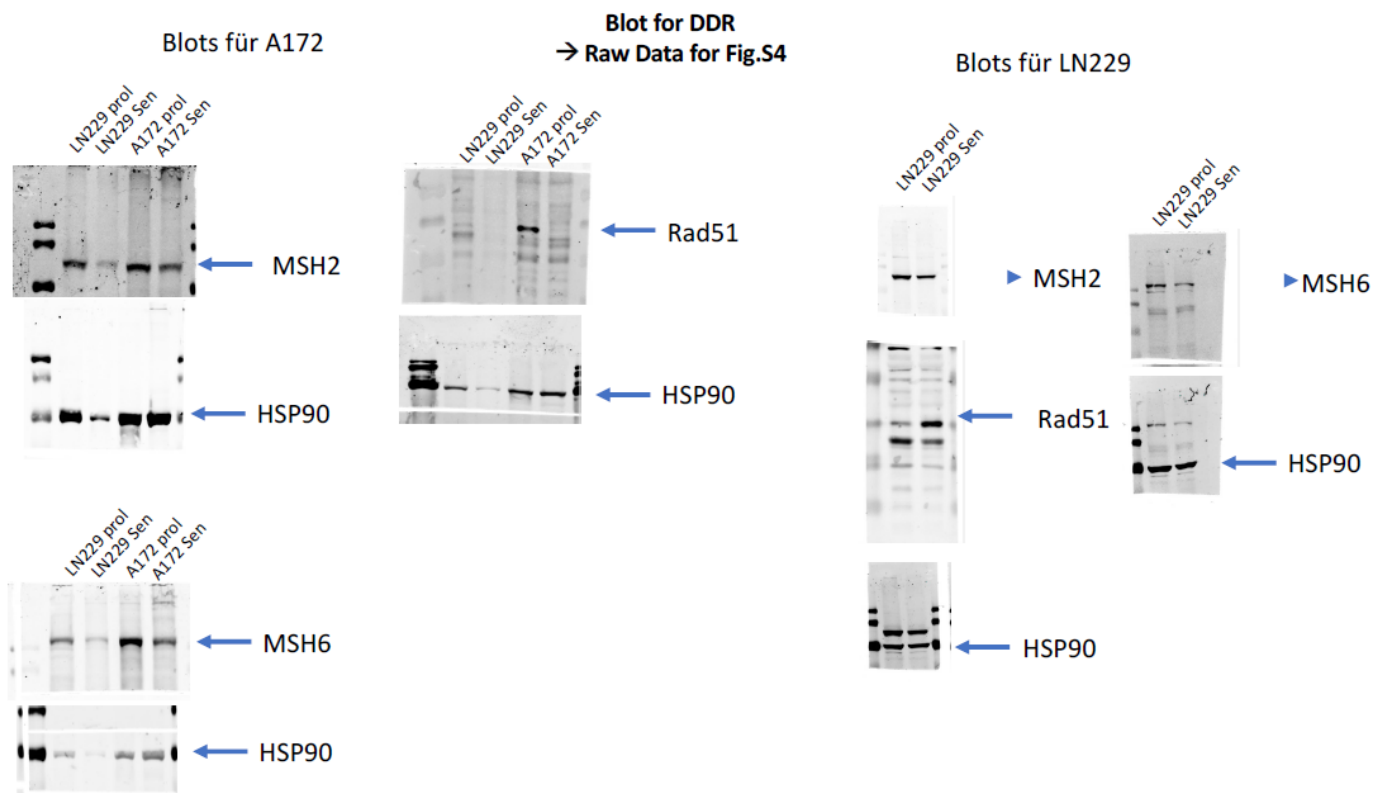

Raw data for Figure S4.

**Blot for MGMT in normal and resistant cells**  
**→ Raw Data for Fig.S5**

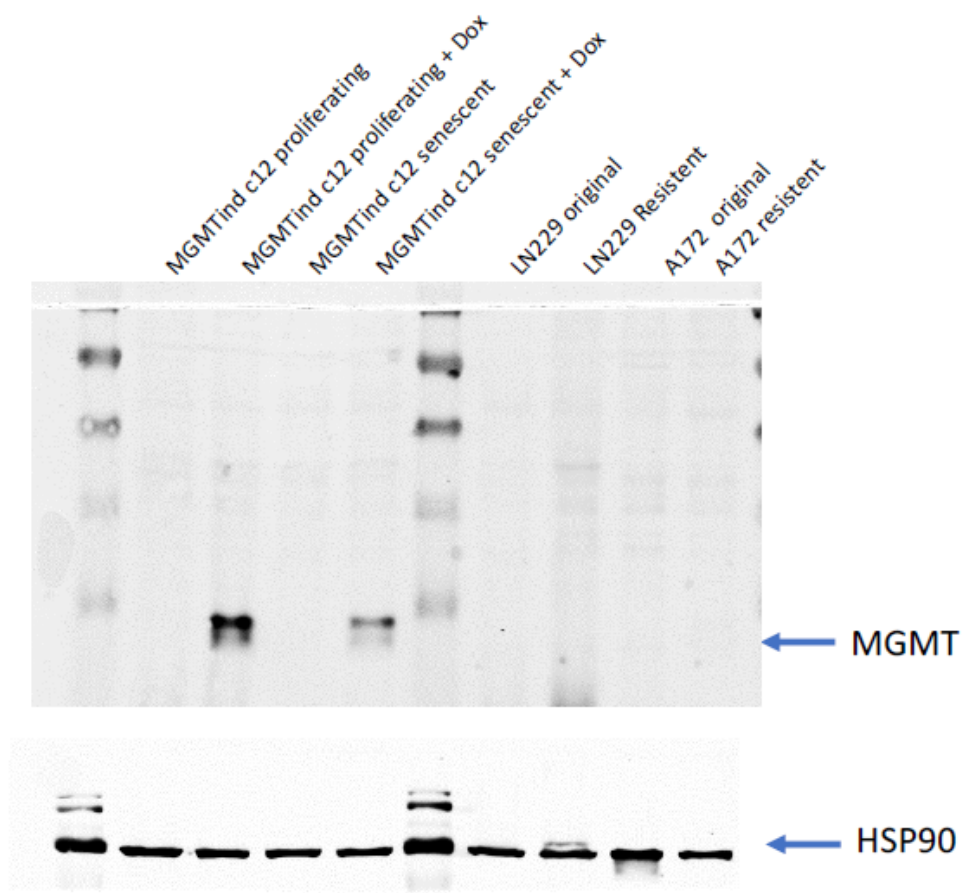

Raw data for Figure S5.
